# Supplementary material
Source: PubMed Central journal article supplement (PMC5095499)
Supplement: IMM-149-400-s001.pdf [file IMM-149-400-s001.pdf]

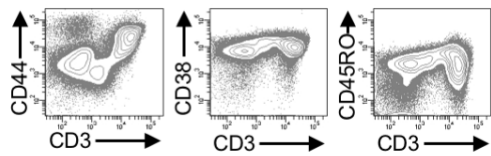

**Suppl. Fig. 1. CD44 expression is highest and CD38 and CD45RO are lowest at the CD3<sup>lo</sup> developmental stage.** Total thymocytes were labeled with CD44, CD38, CD45RO, and CD3 and analyzed by flow cytometry.
