# Supplementary material
Source: PubMed Central journal article supplement (PMC5095499)
Supplement: IMM-149-400-s002.pdf [file IMM-149-400-s002.pdf]

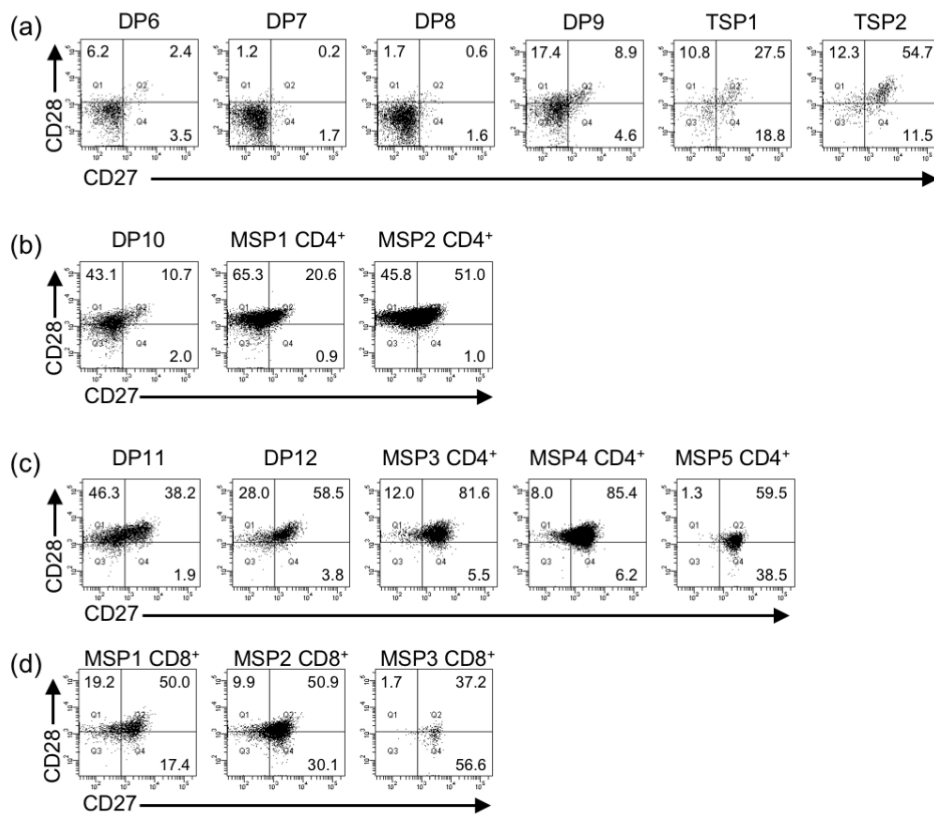

**Suppl. Fig. 2. CD28 expression correlates more closely with positive selection than lineage commitent.** CD28 and CD27 expression were analyzed on the indicated populations of CD3<sup>lo</sup> and CD3<sup>hi</sup> thymocytes.
